# Supplementary material
Source: publisher figshare collection journal article supplement (https://karger.figshare.com/ndownloader/files/23898938)
Supplement: Supplementary file 1 [file 23898938]

**Table S2B.** Sub-analysis of the disease control rate

| **Characteristics** | **With**  **CR + PR + SD** | **Without**  **CR + PR + SD** | **P-value** |
| --- | --- | --- | --- |
| Age, y |  |  |  |
| < 70 | 12 | 16 | 0.4430 |
| ≥ 70 | 14 | 3 |  |
| Sex |  |  |  |
| Male | 12 | 13 | 0.2853 |
| Female | 7 | 3 |  |
| Smoking history |  |  |  |
| Yes | 17 | 7 | 0.6855 |
| No | 9 | 2 |  |
| Histology |  |  |  |
| Adenocarcinoma | 23 | 6 | 0.1619 |
| Non-adenocarcinoma | 3 | 3 |  |
| EGFR mutation |  |  |  |
| Wild type | 13 | 7 | 0.2635 |
| Mutant | 11 | 2 |  |
| Previous chemotherapy |  |  |  |
| Once | 20 | 7 | 1.000 |
| Twice | 6 | 2 |  |

EGFR: epidermal growth factor receptor; CR: complete response; PR: partial response; SD: stable disease
